# Supplementary material for: Type I IFN protects cancer cells from CD8+ T cell–mediated cytotoxicity after radiation
Source: JCI journal article supplement (doi:10.1172/jci127458), 2019-09-03
Supplement: sd1 [file 1]

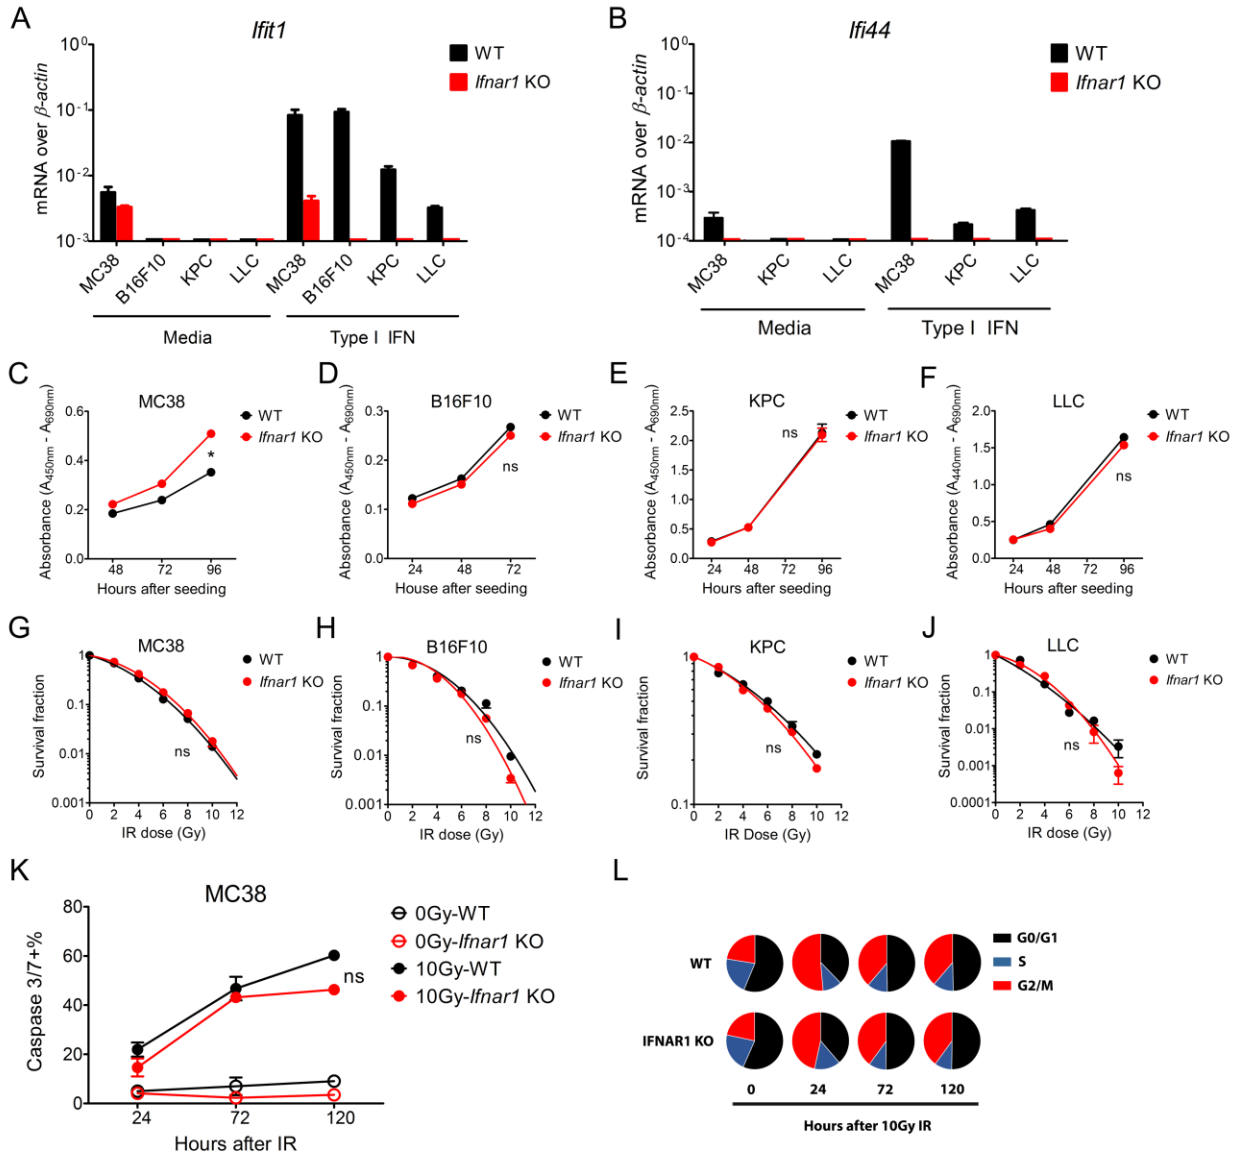

**Figure S1. The radiosensitivity and proliferation in culture of WT and *Ifnar1* KO MC38, B16F10, KPC and LLC cells are similar.** *Ifnar1* was genetically eliminated in the indicated cancer cell lines using CRISPR/Cas9. WT and *Ifnar1* KO MC38, B16F10, KPC and LLC cells were exposed to type I IFN (50 U/ml) for 4 hours. *Ifit1* (**A**) and *Ifi44* (**B**) expression in these cells was evaluated by RT-qPCR. N = 3. The proliferation of the indicated cells in tissue culture was evaluated using a WST-1 assay and plotted in (**C-F**). N = 5-8. Clonogenic survival of the indicated cells was shown in (**G-J**). N = 3. The percentages of apoptotic MC38 cells (WT and *Ifnar1* KO) at indicated time points following 10 Gy IR was determined by flow cytometry with Caspase 3/7-FITC staining (**K**). N = 3. The distribution of cell cycle phases (G0/G1, S and G2/M phases) in MC38 cells (WT and *Ifnar1* KO) at indicated times following 10 Gy IR was determined using flow cytometry after Propidium Iodide (PI) staining (**L**). N = 1. Data represent mean  $\pm$  SD. Comparison of two means was performed by the Mann-Whitney U test (ns: P > 0.05, \* P < 0.05, \*\* P < 0.01, \*\*\* P < 0.001).

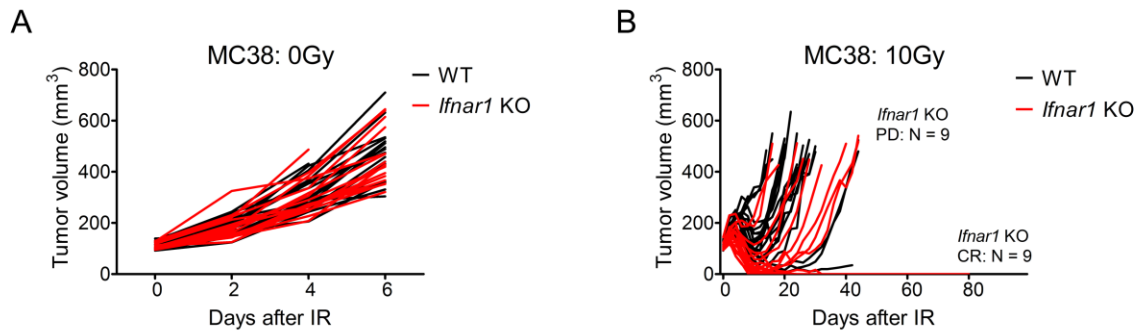

**Figure S2. Growth of individual tumors.** Growth of individual tumors (WT and *Ifnar1* KO MC38) following 0Gy or 10Gy IR (data from **Figure 1A**) are shown in **(A)** and **(B)**. N = 18 for the WT group and 17 for the *Ifnar1* KO group in **(A)**. N = 20 for the WT group and 18 for the *Ifnar1* KO group in **(B)**. The number of tumors with progressive disease (PD) or complete regression (CR) in the *Ifnar1* KO group of **(B)** is indicated.

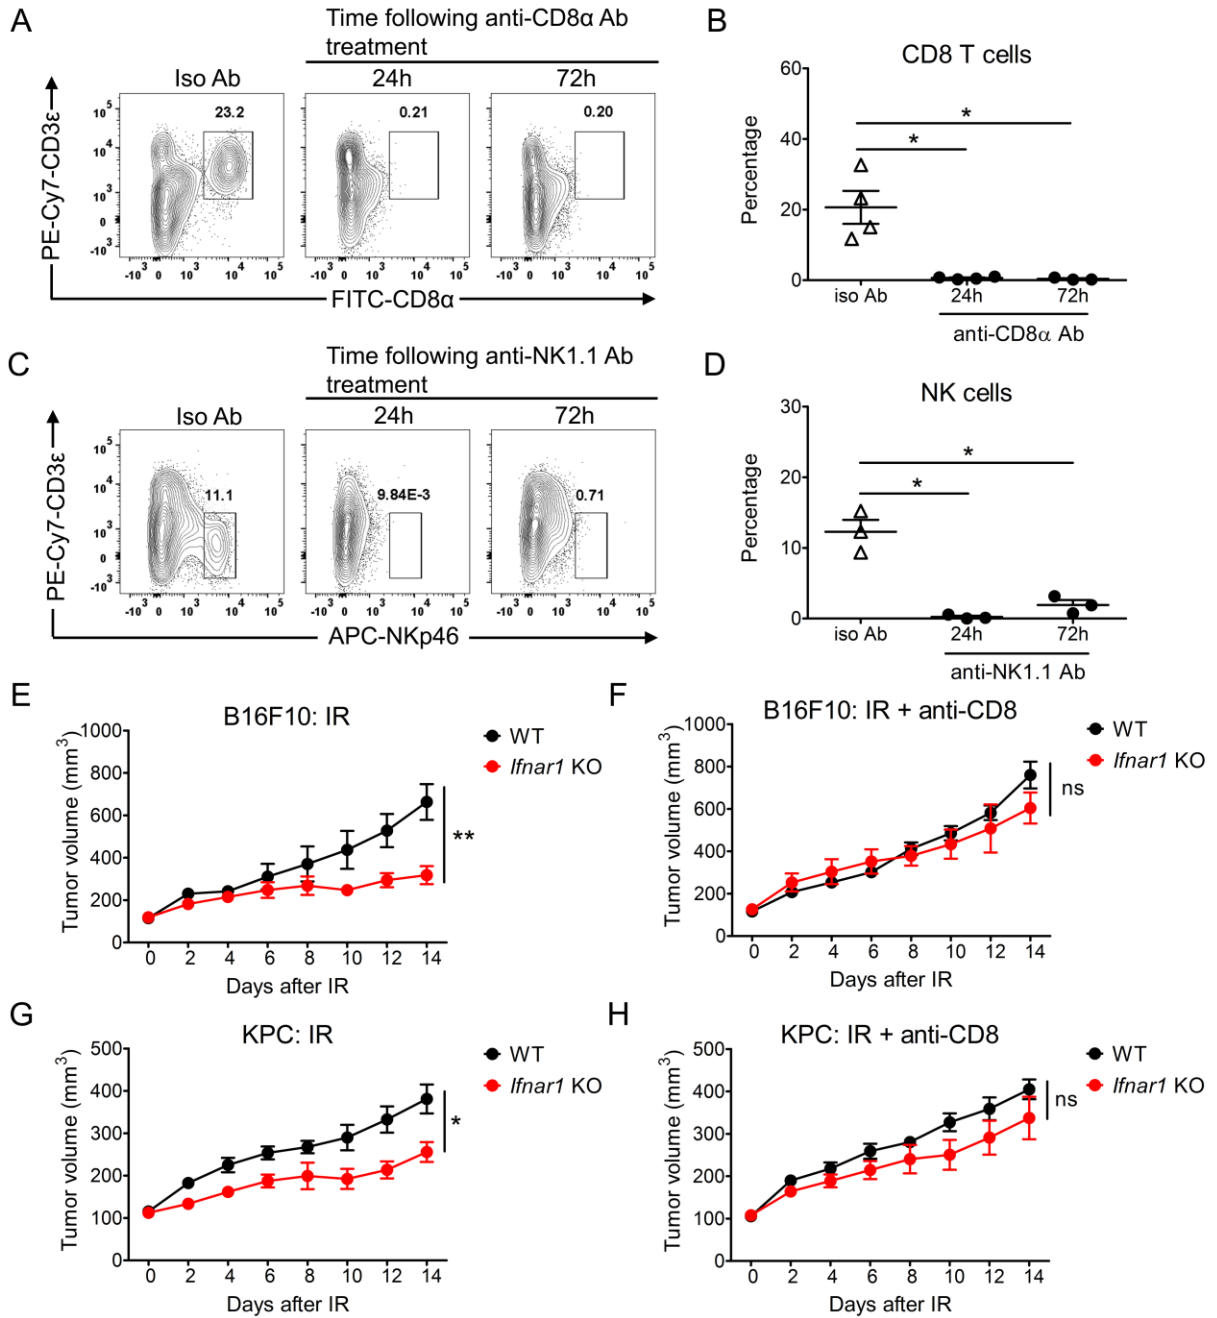

**Figure S3. The enhanced response of *Ifnar1* KO tumors to IR in B16F10 and KPC models is mediated by CD8 T cells.** C57BL/6 mice bearing MC38 tumors received rat IgG2b isotype control antibody, anti- CD8 Ab, mouse IgG2a isotype control Ab, or anti-NK1.1 IgG2a Ab. 24 and 72 hours following injection, the percentages of tumor-infiltrating CD8 T cells (representative plot in **(A)** and quantification in **(B)**) or NK cells (representative plot in **(C)** and quantification in **(D)**) out of total live CD45 positive cells was assessed by flow cytometry. Data represent mean  $\pm$  SD. Subcutaneous tumors from WT or *Ifnar1* KO B16F10, or KPC tumors in C57BL/6 mice were subjected to 20Gy and 15Gy IR respectively, on day 0. Abs were administered on days -1, 2, 5, 8 and 11. Following IR, tumor volumes were measured every other day using callipers and summarized in **(E-H)**. The growth of WT and *Ifnar1* KO tumors following IR is plotted in **(E)** and **(G)**. N = 5-6. Data represent mean  $\pm$  SEM. Comparison of two means was performed by the Mann-Whitney U test (ns:  $P > 0.05$ , \*  $P < 0.05$ , \*\*  $P < 0.01$ , \*\*\*  $P < 0.001$ ).

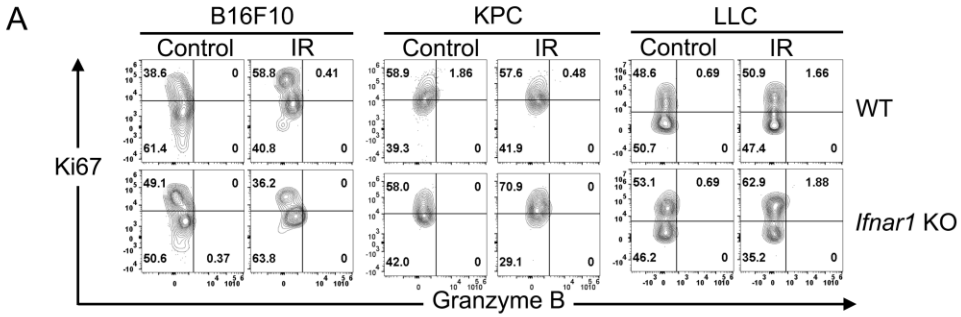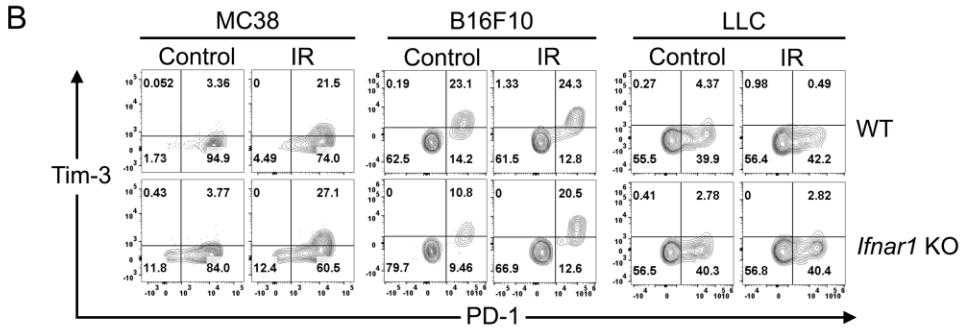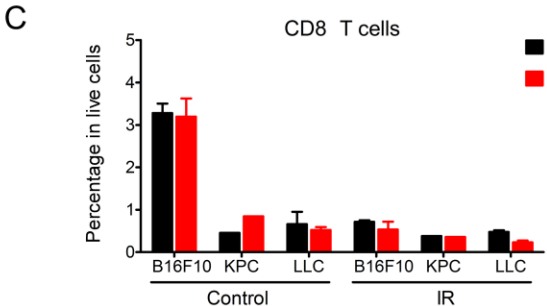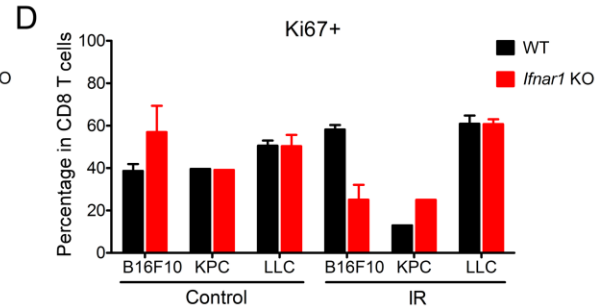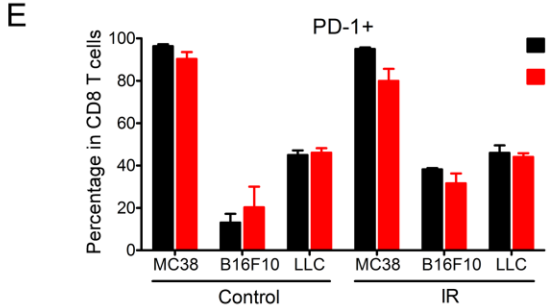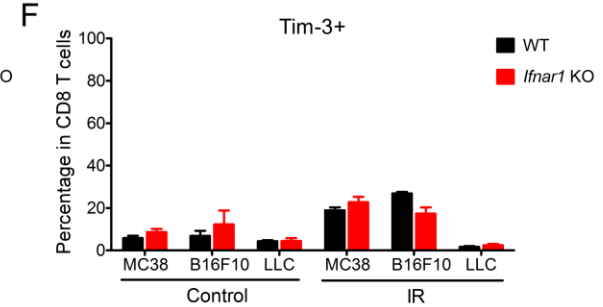

**Figure S4. Infiltrating CD8 T cells from *Ifnar1* KO tumors did not exhibit either increased cytotoxic markers or reduced exhaustion.** Tumors in C57BL/6 mice from MC38, B16F10, KPC or LLC cells (WT and *Ifnar1* KO) were subjected to 0 Gy, 10Gy (MC38 and LLC), 15Gy (KPC) and 20Gy (B16F10) IR. At day 4 after IR, tumors were harvested and disaggregated for CD8 T cell profiling using flow cytometry.

Representative plots for the characterization of gated CD8 T cells are shown in **(A)** with Granzyme B plotted against Ki67 and in **(B)** Tim-3 plotted against Pd-I1. **(C)** shows the percentage of CD8 T cells out of total live cells. The percentages of Ki67 **(D)**, PD-1**(E)** and Tim-3 **(F)** positive CD8 T cells in WT or *Ifnar1* KO tumors with or without IR are shown. N = 3-6 with the exception of KPC which only had one sample and was pooled from 3 individual tumors to obtain sufficient materials for analysis in **(A-C)** and was not analysed further. Data represent mean  $\pm$  SD and could not be calculated for KPC.

Comparison of two means was performed by the Mann-Whitney U test (ns:  $P > 0.05$ , \*  $P < 0.05$ , \*\*  $P < 0.01$ , \*\*\*  $P < 0.001$ ).

A

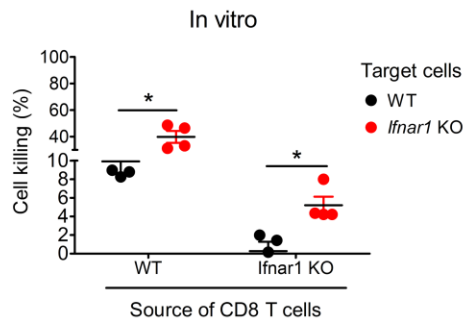

B

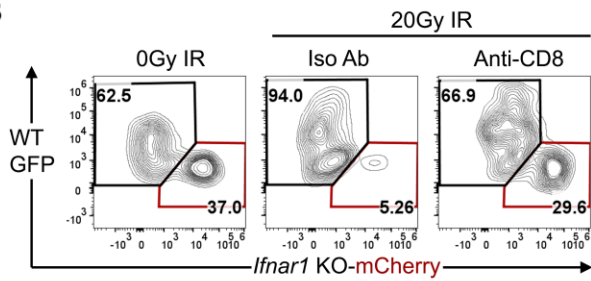

C

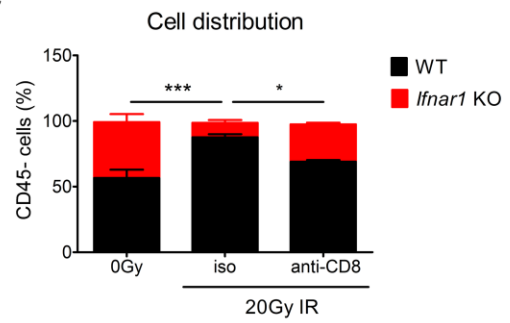



**Figure S5 *Ifnar1* KO B16F10 cells are more vulnerable to CD8 T cell-mediated cytotoxicity.** WT and *Ifnar1* KO B16F10 cells were co-cultured with CD8 T cells derived from either WT or *Ifnar1* KO B16F10 tumors at ratio of CD8 T cells: tumor cell ratio of 3:2 for 48 hours. The percentage of cell killing was quantified in **(A)**. N = 4. GFP-tagged WT B16F10 cells were mixed with mCherry-tagged *Ifnar1* KO B16F10 cells at a ratio of 1:1 and injected into C57BL/6 mice subcutaneously. Established tumors were subjected to the following treatments: 0Gy, 20 Gy (day 0) + isotype control Abs and 20 Gy + anti-CD8 Abs. Ab was administrated on day -1 and 3. The distribution of WT-GFP vs *Ifnar1* KO-mCherry MC38 cells in the CD45 negative live cell population at day 6 was assessed by flow cytometry (representative plot in **(B)** and quantification in **(C)**). N = 4. Data represent mean  $\pm$  SD. Comparison of two means was performed by the Mann-Whitney U test. Comparison of means was performed by one-way ANOVA with Tukey's multiple-comparisons test (ns:  $P > 0.05$ , \*  $P < 0.05$ , \*\*  $P < 0.01$ , \*\*\*  $P < 0.001$ ).

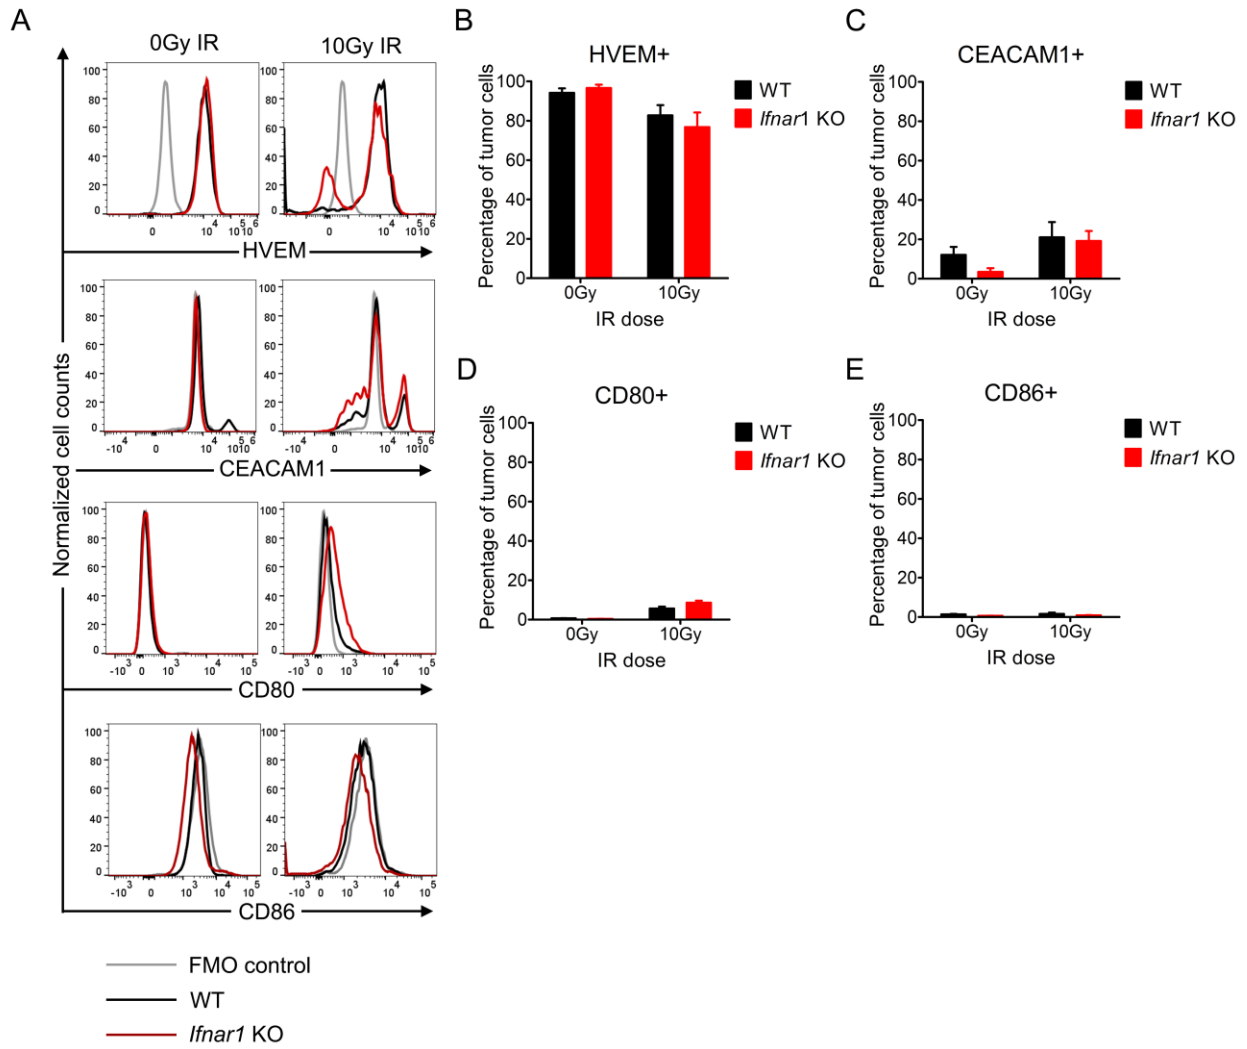

**Figure S6 Flow cytometry profiling of immunomodulators on the surface of MC38 cells in vivo with or without IR.** WT or *Ifnar1* KO MC38 tumors in C57BL/6 mice were subjected to 0 Gy or 10 Gy IR (day 0). At day 4 following IR, tumors were harvested, disaggregated, and assessed by flow cytometry. Tumor cells were gated as Alexa Fluor 700-CD45 negative, APC-CD31 negative, APC-CD140a negative live cells. HVEM, CEACAM1, CD80 and CD86 were assessed (representative plot in **(A)**). Cells stained with FMO control Ab were used as negative controls (grey line). WT MC38 cells in black and *Ifnar1* KO MC38 in red. The percentages of positive cells are summarized in **(B-E)**. N = 5. Data represent mean  $\pm$  SD. Comparison of two means was performed by the Mann-Whitney U test (ns: P > 0.05, \* P < 0.05, \*\* P < 0.01, \*\*\* P < 0.001).

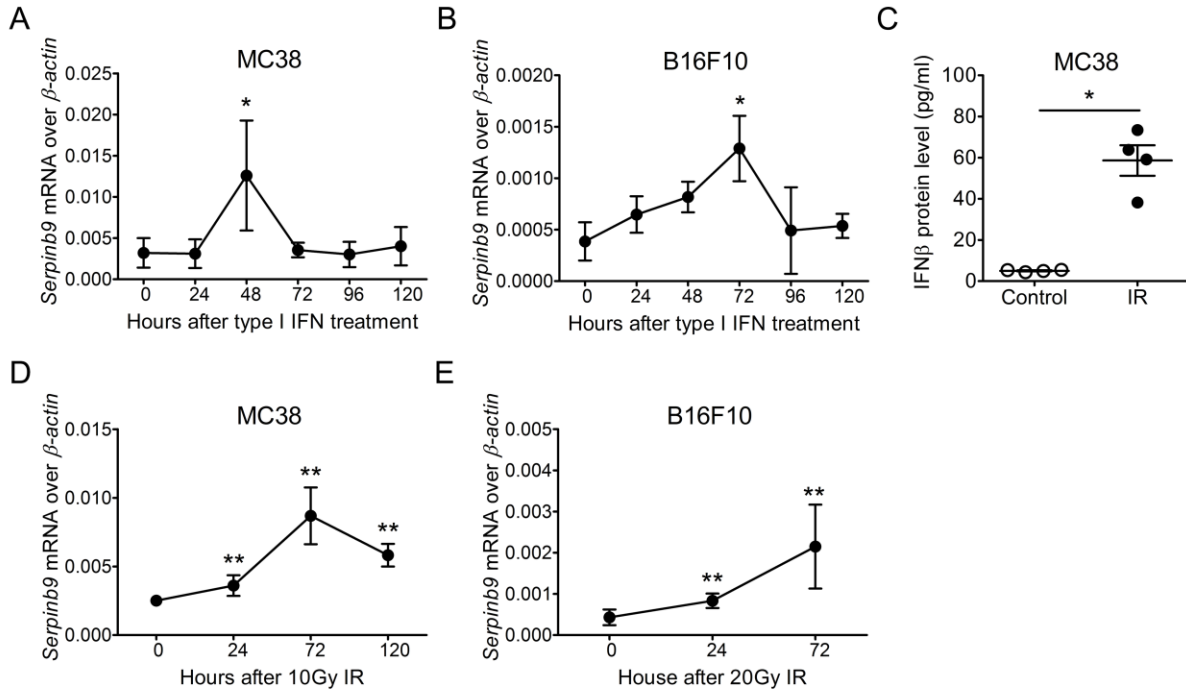

**Figure S7. Induction of *Serpinb9* in MC38 and B16F10 cells after exposure to type I IFN or IR in vitro. (A) and (B): *Serpinb9* expression in MC38 and B16F10 cells at a range of time (0-120 hours) after exposure to type I IFN (250 U/ml) for 4 hours. N = 4. (C): IFN $\beta$  protein level in tissue culture supernatants of MC38 cells was measured by ELISA at 72 hours after 0 or 10 Gy IR. N = 4. (D) and (E): *Serpinb9* expression in MC38 and B16F10 cells at a range of time (0-72 hours) after exposure to IR (10Gy for MC38 and 20Gy for B16F10). N = 6 in (D) and 5 in (E). Data represent mean  $\pm$  SD. *Serpinb9* expression in cells following treatment was compared with that at baseline (0h). Comparison of two means was performed by the Mann-Whitney U test (ns: P > 0.05, \* P < 0.05, \*\* P < 0.01, \*\*\* P < 0.001).**

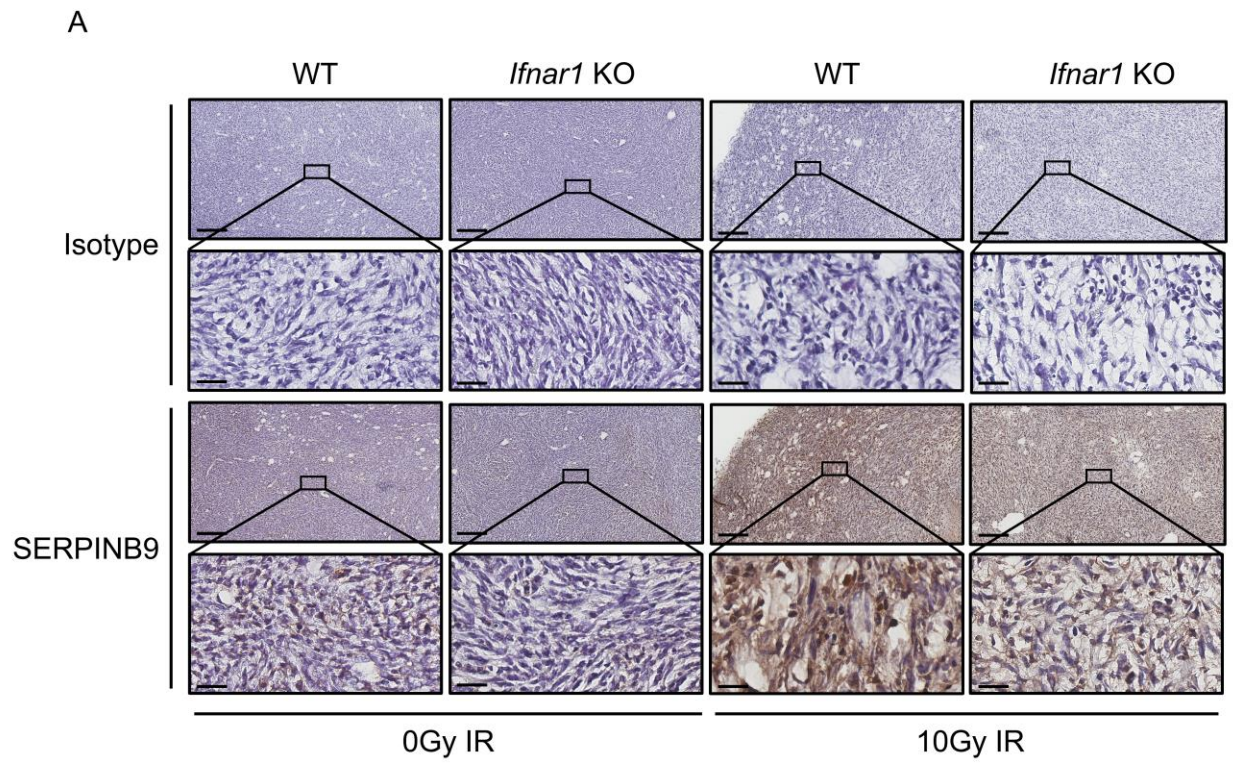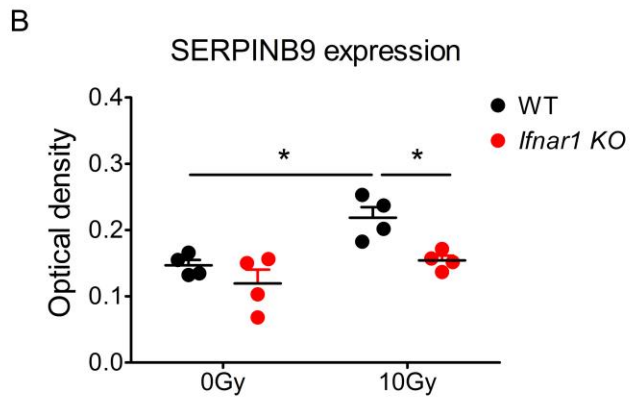

**Figure S8. Abrogation of type I IFN signaling in cancer cells reduced the induction of SERPINB9 expression by IR in MC38 tumor sections.** WT and *Ifnar1* KO MC38 tumors in C57BL/6 mice were collected at day 4 following 0 Gy or 10 Gy IR. Expression of SERPINB9 in these tumors was assessed by immunohistochemical staining. Representative images are shown in **(A)**. Tissue sections were staining with either rabbit isotype control Ab (the first and second rows) or rabbit anti-SERPINB9 Ab (the third and fourth rows). The staining was developed by Horseradish peroxidase/ 3,3'-Diaminobenzidine (brown) with hematoxylin counterstain (blue-purple). The scale bar is 200  $\mu$ m for the first and third rows, and 30  $\mu$ m for the second and fourth rows. The optical density of SERPINB9 staining was normalized by subtracting the optical density value of isotype control from the same slide and summarized in **(B)**. N = 4. Data represent mean  $\pm$  SD. Comparison of means was performed by one-way ANOVA with Tukey's multiple-comparisons test (ns: P > 0.05, \* P < 0.05, \*\* P < 0.01, \*\*\* P < 0.001).

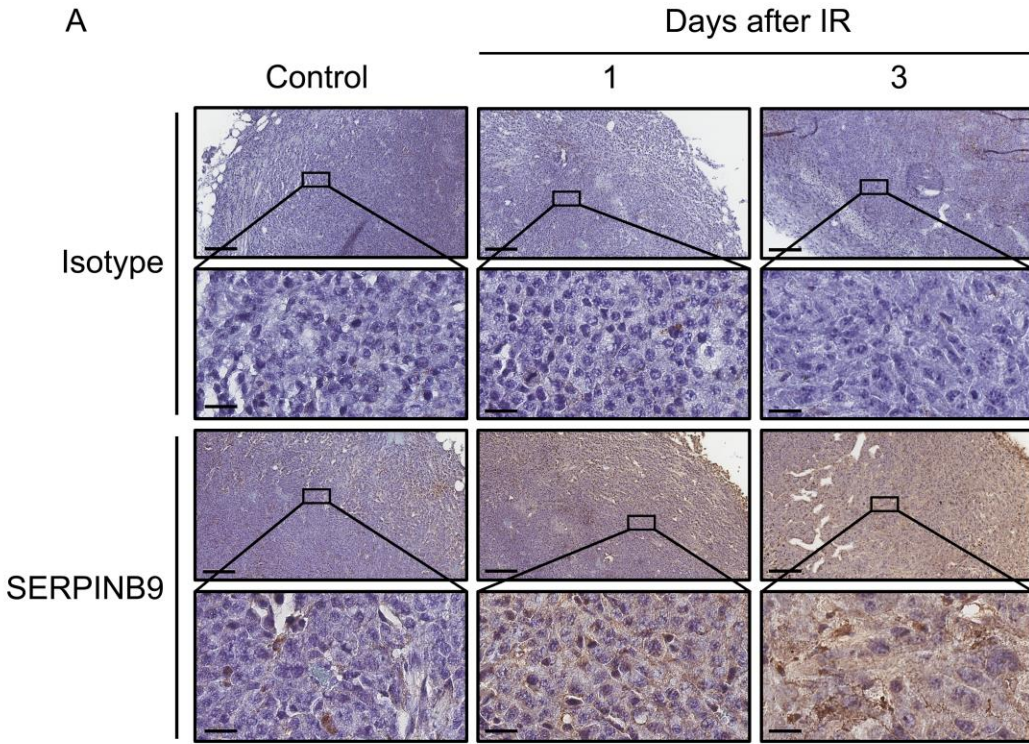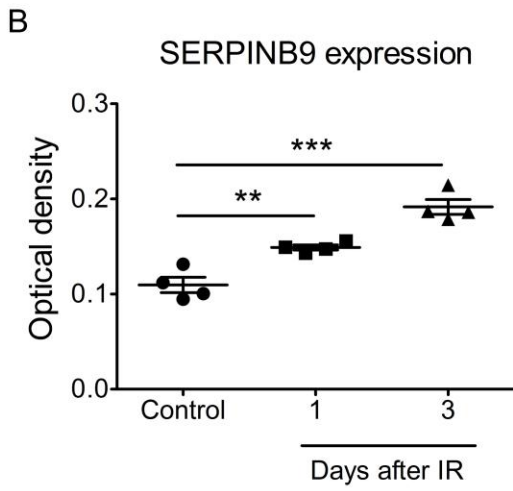

**Figure S9. Induction of SERPINB9 expression by IR in B16F10 tumor sections.** WT B16F10 tumors in C57BL/6 mice were collected at day 0 (control), 1 and 3 following 15 Gy IR. Expression of SERPINB9 in these tumors was assessed by immunohistochemical staining. Representative images are shown in **(A)**. Tissue sections were staining with either rabbit isotype control Ab (the first and second rows) or rabbit anti-SERPINB9 Ab (the third and fourth rows). The staining was developed by Horseradish peroxidase/ 3,3'-Diaminobenzidine (brown) with hematoxylin counterstain (purple). The scale bar is 200  $\mu\text{m}$  for the first and third rows, and 30  $\mu\text{m}$  for the second and fourth rows. The optical density of SERPINB9 staining was normalized by subtracting the optical density value of isotype control from the same slide and summarized in **(B)**. N = 4. Comparison of means was performed by one-way ANOVA with Tukey's multiple-comparisons test (ns:  $P > 0.05$ , \*  $P < 0.05$ , \*\*  $P < 0.01$ , \*\*\*  $P < 0.001$ ).



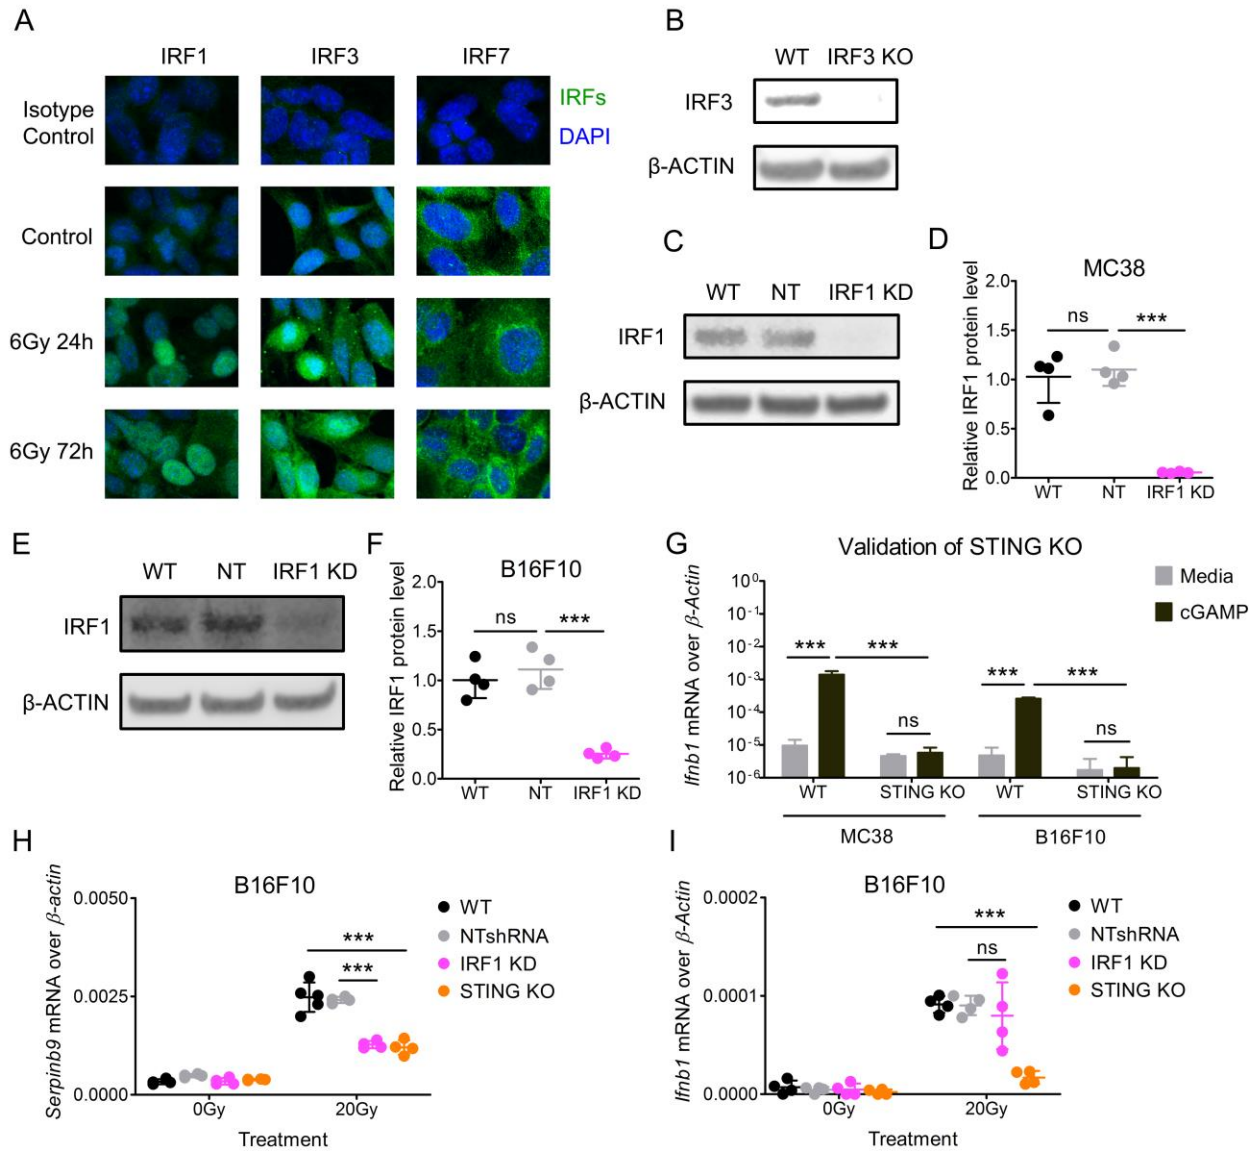

**Figure S10 IR augmented expression of Serpinb9 in cancer cells via STING-mediated type I IFN induction as well as IFN signaling-independent mechanisms.**

**(A):** Distribution of IRFs (IRF1, IRF3 and IRF7) in MC38 cells 24 hours following 0 Gy (second row), 24 or 72 hours following 6 Gy IR (third and fourth row). Irradiated cells stained with rabbit isotype control Ab are shown in the first row. IRFs are in green and DAPI in blue. The KO of IRF3 in MC38 cells was validated in **(B)**. The knockdown efficacy of IRF1 in MC38 cells and B16F10 cells (WT, WT cells transfected with non-targeting shRNA lentivirus (NTshRNA), IRF1 knockdown (KD)) was assessed by Western blot **(C-F)**. N = 4 in both **(D)** and **(F)**. B-ACTIN was used as the loading control. The KO of STING in MC38 and B16F10 cells was validated in **(G)**. WT and STING KO MC38 and B16F10 cells were treated with control media or cGAMP (delivered via Lipofectamine 3000) for 6 hours in tissue culture. Following treatment, *Ifnb1* expression in these cells was evaluated by RT-qPCR. N = 4. **(H)** and **(I)**: *Serpinb9* and *Ifnb1* expression in B16F10 cells (WT, NTshRNA, IRF1 KD and STING KO) at 72 hours after 20Gy. N = 4. All mRNA expression levels were normalized to  $\beta$ -actin. Data represent mean  $\pm$  SD. Comparison of means was performed by one-way ANOVA with Tukey's multiple-comparisons test (ns: P > 0.05, \* P < 0.05, \*\* P < 0.01, \*\*\* P < 0.001).

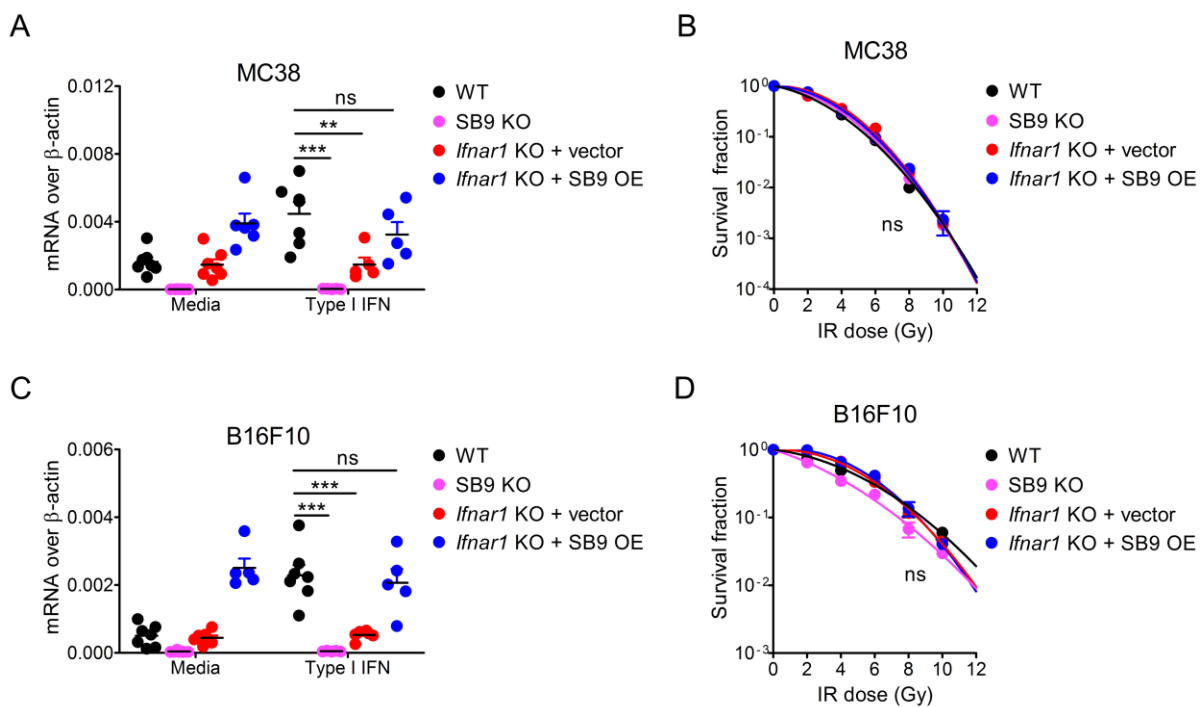

**Figure S11 MC38 and B16F10 cells with different phenotypes are**

**indistinguishable in radiosensitivity.** MC38 and B16F10 cells (4 phenotypes for each

cell line: WT, *Serpinb9* KO (SB9 KO), *Ifnar1* KO + vector, *Ifnar1* KO + *Serpinb9*

overexpression (SB9 OE)) were stimulated with control media or type I IFN (50 U/ml) for

4 hours. The expression of *Serpinb9* was assessed with data summarized in **(A)** and

**(C)**. N = 5-7. Radiosensitivity of these cells was evaluated by clonogenic assay and

summarized in **(B)** and **(D)**. N = 3. Data represent the mean  $\pm$  SD. Comparison of

means was performed by one-way ANOVA with Tukey's multiple-comparisons test (ns:

P > 0.05, \* P < 0.05, \*\* P < 0.01, \*\*\* P < 0.001).

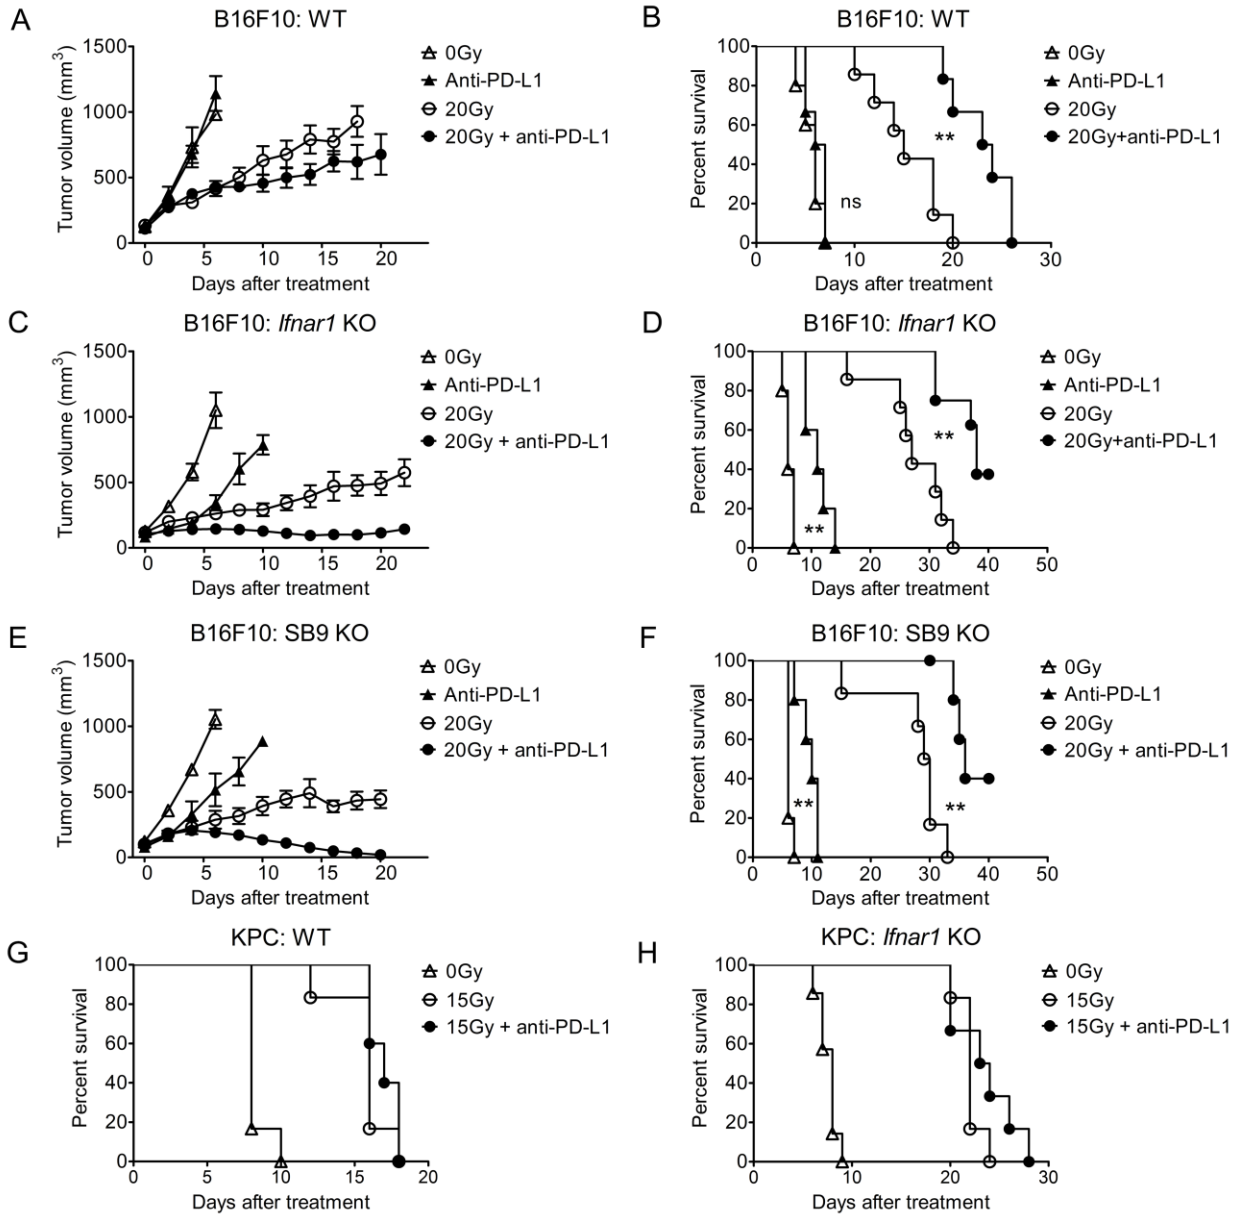

**Figure S12. *Ifnar1* KO or *Serpib9* KO B16F10 or KPC tumors exhibited greater levels of response to anti-PD-L1.** C57BL/6 mice bearing subcutaneous B16F10 (WT, *Ifnar1* KO and *Serpib9* (SB9) KO or KPC (WT and *Ifnar1* KO) were subjected to the following treatments: (1) 0 Gy IR; (2) anti-PD-L1; (3) IR (20Gy for B16F10 and 15Gy for KPC) on day 0; (4) IR plus anti-PD-L1 Ab. Anti-PD-L1 was given on days -1, 3, 7 and 11. Following IR, tumor volumes were measured every other day and summarized in **(A)**, **(C)** and **(E)**. Kaplan-Meier survival curves of mice were plotted in **(B)**, **(D)** and **(F-H)**. N = 5-8. Data represent mean  $\pm$  SEM. Comparison of two means was performed by the Mann-Whitney U test. Survival comparisons between groups were performed using the log-rank's test (ns:  $P > 0.05$ , \*  $P < 0.05$ , \*\*  $P < 0.01$ , \*\*\*  $P < 0.001$ ).

**Table S1. List of antibodies used in this study**

| Antibodies                                          | Sources       | Cat#        | Dilutions | Application |
|-----------------------------------------------------|---------------|-------------|-----------|-------------|
| Rat anti-mouse CD16/CD32                            | BD Bioscience | 553141      | 1:50      | Fc block    |
| FITC anti-mouse CD8a (clone 53-6.7)                 | eBioscience   | 11-0081-81  | 1:160     | FC          |
| FITC anti-mouse CD31 (clone 390)                    | eBioscience   | 11-0311-82  | 1:160     | FC          |
| FITC anti-mouse CD140a (clone APA5)                 | eBioscience   | 11-1401-80  | 1:80      | FC          |
| Alexa Fluor 488 anti-mouse CEACAM1a (clone MAb-CC1) | BioLegend     | 134525      | 1:200     | FC          |
| PerCP-Cy5.5 anti-mouse Galectin-9 (clone RG9-35)    | BioLegend     | 136111      | 1:160     | FC          |
| PE anti-Ki-67 (clone SolA15)                        | eBioscience   | 12-5698-82  | 1:660     | FC          |
| PE anti-mouse CD86 (clone B7-2)                     | eBioscience   | 12-0862-81  | 1:160     | FC          |
| PE anti-mouse HVEM (clone HMHV-1B18)                | BioLegend     | 136303      | 1:40      | FC          |
| PE-Cy7 anti-mouse CD45 (clone 30-F11)               | eBioscience   | 25-0451-81  | 1:160     | FC          |
| PE-Cy7 anti-mouse Granzyme B (clone NGZB)           | eBioscience   | 25-8898-82  | 1:330     | FC          |
| PE-Cy7 anti-mouse CD3 $\epsilon$ (clone 145-2C11)   | eBioscience   | 25-0031-81  | 1:40      | FC          |
| APC anti-mouse Tim-3 (clone RMT3-23)                | BioLegend     | 119705      | 1:160     | FC          |
| APC anti-mouse IFN $\gamma$ (clone XMG1.2)          | eBioscience   | 17-7311-81  | 1:160     | FC          |
| APC anti-mouse CD31 (clone 390)                     | eBioscience   | 17-0311-082 | 1:160     | FC          |
| APC anti-mouse CD140a (clone APA5)                  | eBioscience   | 17-1401-81  | 1:80      | FC          |
| APC anti-mouse NKp46 (clone 29A1.4)                 | BioLegend     | 137607      | 1:160     | FC          |
| Alexa Fluor 700 anti-mouse CD45 (clone 30-F11)      | eBioscience   | 56-0451-82  | 1:160     | FC          |
| eFluor 780 Fixable Viability Dye                    | eBioscience   | 65-0865-14  | 1:1000    | FC          |
| BV421 anti-mouse PD-L1 (clone 10F.9G2)              | BioLegend     | 124315      | 1:80      | FC          |
| BV 421 anti-mouse PD-1 (clone 29F.1A12)             | BioLegend     | 135221      | 1:80      | FC          |
| BV510 anti-mouse CD3 $\epsilon$ (clone 145-2C11)    | BioLegend     | 100353      | 1:40      | FC          |

|                                                                          |                           |           |              |                         |
|--------------------------------------------------------------------------|---------------------------|-----------|--------------|-------------------------|
| BV605 anti-mouse CD3 $\epsilon$ (clone 145-2C11)                         | BioLegend                 | 100351    | 1:40         | FC                      |
| BV785 anti-mouse CD8a (clone 53-6.7)                                     | BioLegend                 | 100749    | 1:160        | FC                      |
| Alexa Fluor 488 conjugated Goat anti-Rabbit IgG (H+L) Secondary Antibody | Thermo Fisher Scientific  | A-11034   | 1:500        | IF                      |
| IRF-1 (clone D5E4) XP rabbit monoclonal antibody                         | Cell Signaling Technology | 8478      | 1:200/1:1000 | IF/WB                   |
| IRF-3 (clone FL-425) rabbit polyclonal antibody                          | Santa Cruz Biotechnology  | sc-9082   | 1:100        | IF                      |
| IRF7 (clone EPR4718) rabbit monoclonal antibody                          | Abcam                     | ab109255  | 1:500        | IF                      |
| Rabbit IgG Control                                                       | R & D                     | AB-105-C  | Accordingly  | IF/IHC                  |
| SerpinB9 antibody                                                        | GeneTex                   | GTX54693  | 1:500        | IHC                     |
| $\beta$ -Actin (clone 8H10D10) Mouse mAb                                 | Cell Signaling Technology | 3700      | 1:5000       | WB                      |
| IRDye 800CW Goat Anti-Rabbit IgG (H+L)                                   | Li-cor                    | 926-32211 | 1:10000      | WB                      |
| IRDye 680RD Goat Anti-Mouse IgG (H+L)                                    | Li-cor                    | 926-68070 | 1:10000      | WB                      |
| InVivoMAb rat anti-mouse CD8 $\alpha$ (clone 2.43)                       | Bio X cell                | BE0061    | NA           | Cells in vivo depletion |
| InVivoMAb rat IgG2b isotype control (clone LTF-2)                        | Bio X cell                | BE0090    | NA           | Isotype control         |
| InVivoMAb mouse anti-mouse NK1.1 (clone PK136)                           | Bio X cell                | BE0036    | NA           | Cells in vivo depletion |
| InVivoMAb mouse IgG2a isotype control (clone C1.18.4)                    | Bio X cell                | BE0085    | NA           | Isotype control         |
| InVivoMAb rat anti-mouse PD-L1 (clone 10F.9G2)                           | Bio X cell                | BE0101    | NA           | In vivo blockade        |

Cat#: catalogue number; NA: Not applicable; FC: Flow cytometry; IF: Immunofluorescence staining; IHC: Immunohistochemistry; WB: Western blot.

**Table S2. Primers for SBYR Green-based RT-qPCR**

| Genes            | Accessions   |   | Sequences (5' - 3')      | Amplicon lengths |
|------------------|--------------|---|--------------------------|------------------|
| <i>Serpinb9</i>  | NM_009256    | F | TCAGGTGGCTCCGTCGATT      | 107              |
|                  |              | R | GGCATGTCCATTGTGTACTCTT   |                  |
| <i>Serpinb9b</i> | NM_011452    | F | CCTGACTGCTCACAAGCC       | 207              |
|                  |              | R | AGTAAAACCCATAGCACT       |                  |
| <i>Bcl2</i>      | NM_009741    | F | ATGCCTTTGTGGA ACTATATGGC | 120              |
|                  |              | R | GGTATGCACCCAGAGTGATGC    |                  |
| <i>Bcl2l1</i>    | NM_001191    | F | AACATCCCAGCTTCACATAACCCC | 93               |
|                  |              | R | GCGACCCCAGTTTACTCCATCC   |                  |
| <i>Cd274</i>     | NM_021893    | F | CAAGTGAGAATGCTAGATGTG    | 176              |
|                  |              | R | TCCATCTTGAGTCTTTGGAC     |                  |
| <i>Lgals9</i>    | NM_010708    | F | ATGCCCTTTGAGCTTTGCTTC    | 218              |
|                  |              | R | AACTGGACTGGCTGAGAGAAC    |                  |
| <i>Pvr</i>       | NM_027514    | F | CAACTGGTATGTTGGCCTCA     | 198              |
|                  |              | R | ATTGGTGACTTCGCACACAA     |                  |
| <i>H2-K1</i>     | NM_001001892 | F | GCTGGTGAAGCAGAGAGACTCAG  | 154              |
|                  |              | R | GGTGACTTTATCTTCAGGTCTGCT |                  |
| <i>Ifnb1</i>     | NM_002176    | F | CAGCTCCAAGAAAGGACGAAC    | 137              |
|                  |              | R | GGCAGTGTA ACTCTTCTGCAT   |                  |
| <i>β-actin</i>   | NM_007393    | F | CGGTTCCGATGCCCTGAGGCTCTT | 99               |
|                  |              | R | CGTCACACTTCATGATGGAATTGA |                  |

F: forward

R: Reverse



**Table S3. Primers/probes for TaqMan-based RT-qPCR**

| Genes                           | Accessions | Primers/probes |
|---------------------------------|------------|----------------|
| <i>Ifit1</i>                    | NM_008331  | Mm00515153_m1  |
| <i>Ifi44</i>                    | NM_133871  | Mm00505670_m1  |
| <i><math>\beta</math>-actin</i> | NM_007393  | Mm02619580_g1  |

**Table S4. CRISPR gRNA sequences**

| Genes                              | Targeted exons | gRNA Pair | Sequences (5'-3')    |
|------------------------------------|----------------|-----------|----------------------|
| <i>Ifnar1</i>                      | 4              | 1         | CCACATGTTCCCGTCTTGTC |
|                                    |                | 2         | TCAGTTACACCATACGAATC |
| <i>Serpinb9</i>                    | 1              | 1         | CAGAGCTGCCTGTACAAGGC |
|                                    |                | 2         | AGCATCAAGGCTGCAAACGC |
| <i>Tmem173</i><br>( <i>Sting</i> ) | 3              | 1         | GTGGATCCTTTGCCACCCAA |
|                                    |                | 2         | CACCTAGCCTCGCACGAACT |
| <i>Irf3</i>                        | 1              | 1         | CAGCTAAGCCTCCGAGCGCT |
|                                    |                | 2         | CGAGTCTCAGAACTACTGTT |



**Table S5. Expression correlation between *SERPINB9* and IFN signature genes in**

**TCGA data.** TCGA gene expression data (RNA-seq V2 RSEM) of 77 IFN signature genes (listed on the first column on the right) and *SERPINB9* in 16 different human cancer types was downloaded via cBioPortal (<http://www.cbioportal.org/>) and log2 transformed. The case numbers for each cancer type were as follows: Prostate Adenocarcinoma (PRAD), n = 498; Breast Invasive Carcinoma (BRCA), n = 1100; Thyroid Carcinoma (THCA), n = 509; Pancreatic Adenocarcinoma (PAAD), n = 178; Kidney Renal Clear Cell Carcinoma (KIRC), n = 446; Lung Adenocarcinoma (LUAD), n = 517; Kidney Renal Papillary Cell Carcinoma (KIRP), n = 291; Brain Lower Grade Glioma (LGG), n = 530; Lung Squamous Cell Carcinoma (LUSC), n = 501; Bladder Urothelial Carcinoma (BLCA), n = 408; Colorectal Adenocarcinoma (COAD), n = 382; Liver Hepatocellular Carcinoma (LIHC), n = 373; Head and Neck Squamous Cell Carcinoma (HNSC), n = 522; Stomach Adenocarcinoma (STAD), n = 415; Skin Cutaneous Melanoma (SKCM), n = 472; Cervical Squamous Cell Carcinoma and Endocervical Adenocarcinoma (CESC), n = 306. The correlation between IFN signature genes and *SERPINB9* was evaluated by Pearson's correlation. Pearson correlation coefficients (r) are indicated. All P values < 0.0001. The genes were ranked according to the mean r value of each row from high to low.
